# Supplementary material for: Preparation and electromagnetic wave absorption properties of novel dendrite-like NiCu alloy composite
Source: Royal Society of Chemistry journal article supplement (doi:10.1039/c5ra05323d), 2015-01-01
Supplement: c5ra05323d1.pdf [file c5ra05323d1.pdf]

## Preparation and electromagnetic wave absorption properties of novel dendrite-like NiCu alloy composite

Biao Zhao <sup>a</sup>, Gang Shao <sup>a,\*</sup>, Bingbing Fan <sup>a</sup>, Wanyu Zhao <sup>a</sup>, Rui Zhang <sup>a,b,\*</sup>

<sup>a</sup> School of Materials Science and Engineering, Zhengzhou University, Zhengzhou, Henan 450001, PR China

<sup>b</sup> Zhengzhou Aeronautical Institute of Industry Management, Zhengzhou, Henan 450046, PR China

\* Corresponding Author.

Prof. Rui Zhang

Tel: +86-371-60632007

Fax: +86-371-60632600

E-mail address: [zhangray@zzu.edu.cn](mailto:zhangray@zzu.edu.cn).

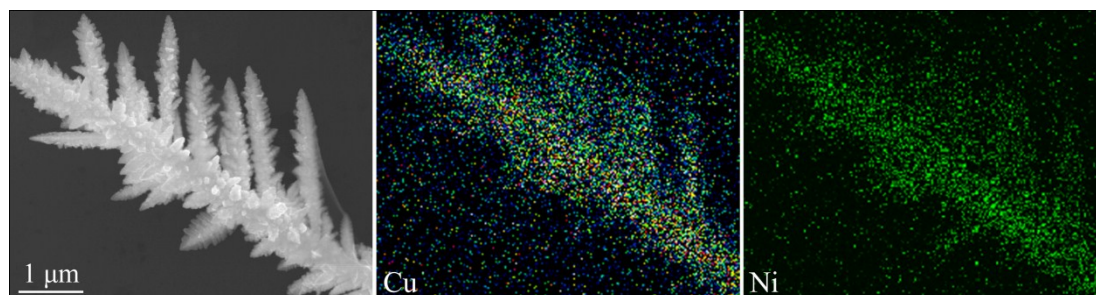

Fig. S1 The high magnification SEM image of dendrite-like NiCu alloy and corresponding elemental mapping.

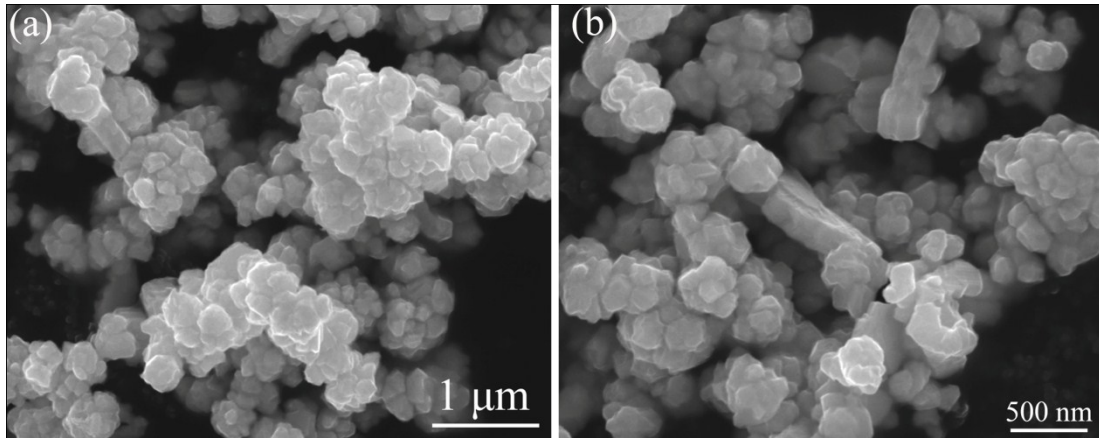

Fig. S2 Different magnification FESEM images of NiCu alloy prepared without ethanediamine.

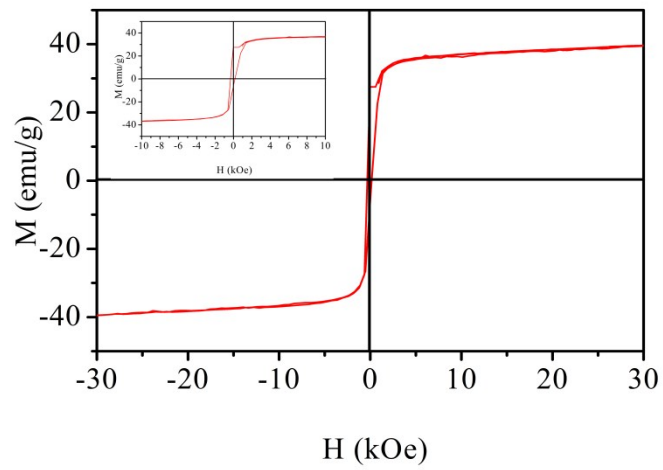

Fig. S3 Magnetic hysteresis loops of NiCu alloy at room temperature. Inset is expanded low field hysteresis curves.

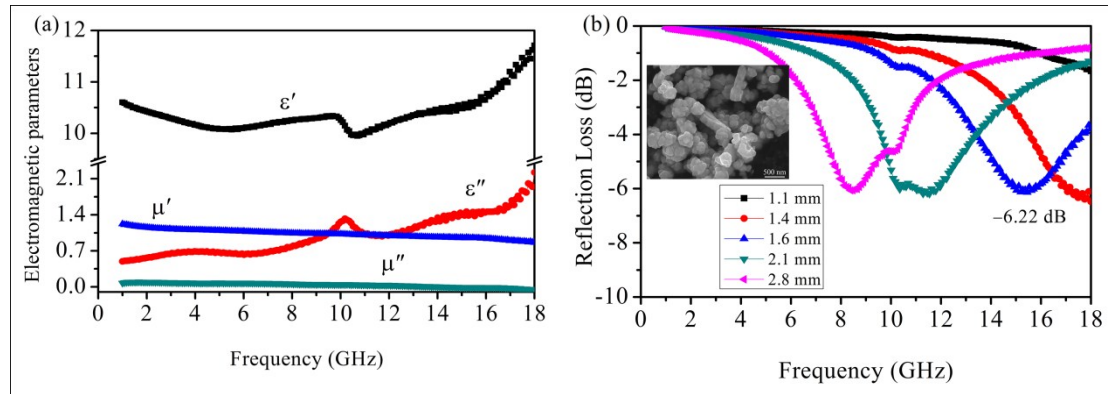

Fig. S4 (a) Electromagnetic parameters and (b) reflection loss of NiCu alloy synthesized without ethanediamine.
